# Supplementary material for: Three novel coordination polymers as bifunctional materials for the photocatalytic degradation of dyes and the oxygen evolution reaction in alkaline solutions
Source: Royal Society of Chemistry journal article supplement (doi:10.1039/d2ce01306a), 2022-12-14
Supplement: d2ce01306a1.pdf [file d2ce01306a1.pdf]

## Supporting Information

# Three novel coordination polymers as bifunctional materials for photocatalytic degradation of dyes and oxygen evolution reaction in alkaline solutions

Siyu Dai<sup>a</sup>, Yuqi Liu<sup>a\*</sup>, Yanghua Li<sup>a</sup>, Nanhao Jin<sup>a,b</sup>, Xinying Wang<sup>a</sup>, Xiaoming Liu<sup>a</sup>, Han Chen<sup>a</sup>, Yue

Zhao<sup>a</sup>, Huilong Luo<sup>c</sup>, Wei Li<sup>a,b\*</sup>.

<sup>a</sup> Faculty of Science, Kunming University of Science and Technology, Kunming 650500, P. R. China

<sup>b</sup> Faculty of Metallurgical and Energy Engineering, Kunming University of Science and Technology, Kunming 650093, P. R. China

<sup>c</sup> Faculty of Civil Engineering and Mechanics, Kunming University of Science and Technology, Kunming 650093, P. R. China

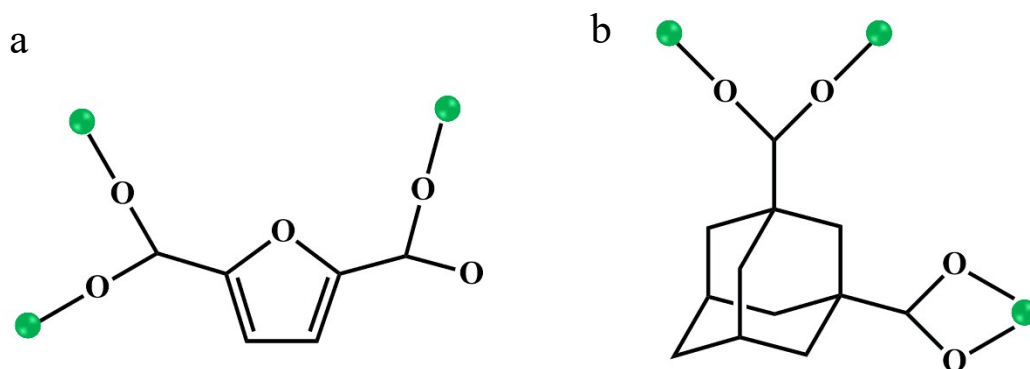

**Fig. S1** **a** 2,5-fdca<sup>2-</sup> links metal atoms in  $\mu_3-(\eta^1:\eta^1:\eta^1)$  link mode; **b** 1,3-abc<sup>2-</sup> links metal atoms in  $\mu_3-(\eta^2:\eta^1:\eta^1)$ .

---

<sup>a\*</sup> Corresponding author. Faculty of Science, Kunming University of Science and Technology, Kunming 650500, P. R. China

<sup>b\*</sup> Corresponding author. Faculty of Metallurgical and Energy Engineering, Kunming University of Science and Technology, Kunming 650093, P. R. China

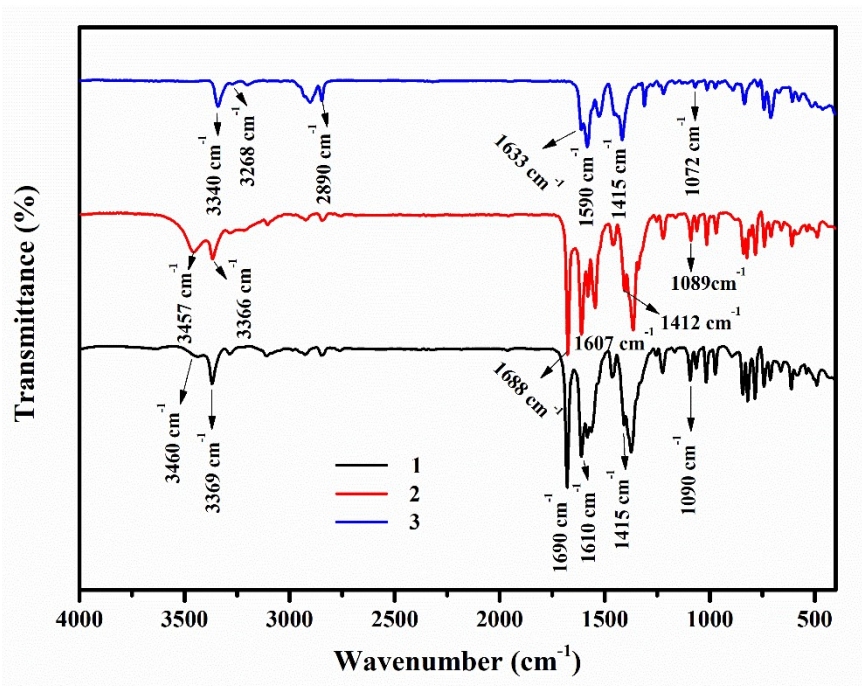

Fig. S2 Infrared spectrogram of CPs 1-3.

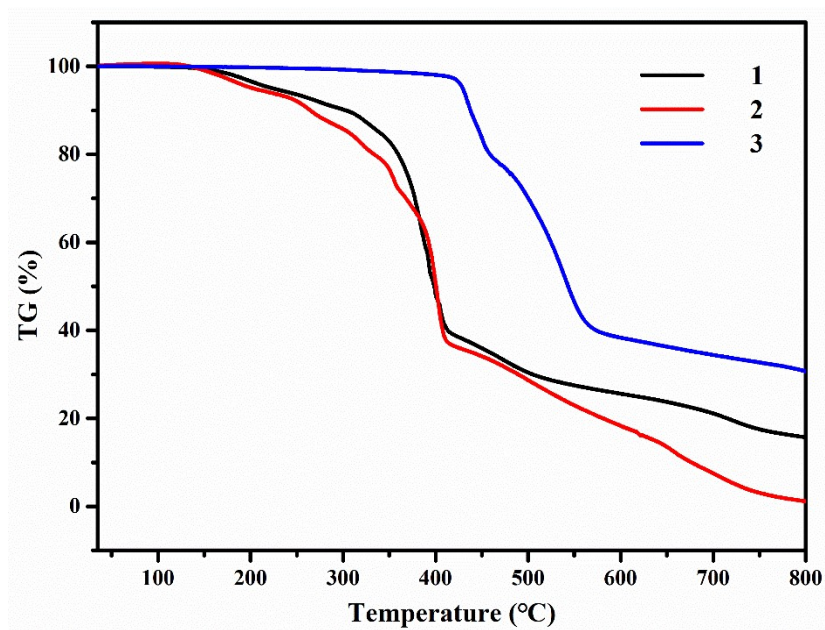

Fig. S3 Thermogravimetric curve of CPs 1-3.

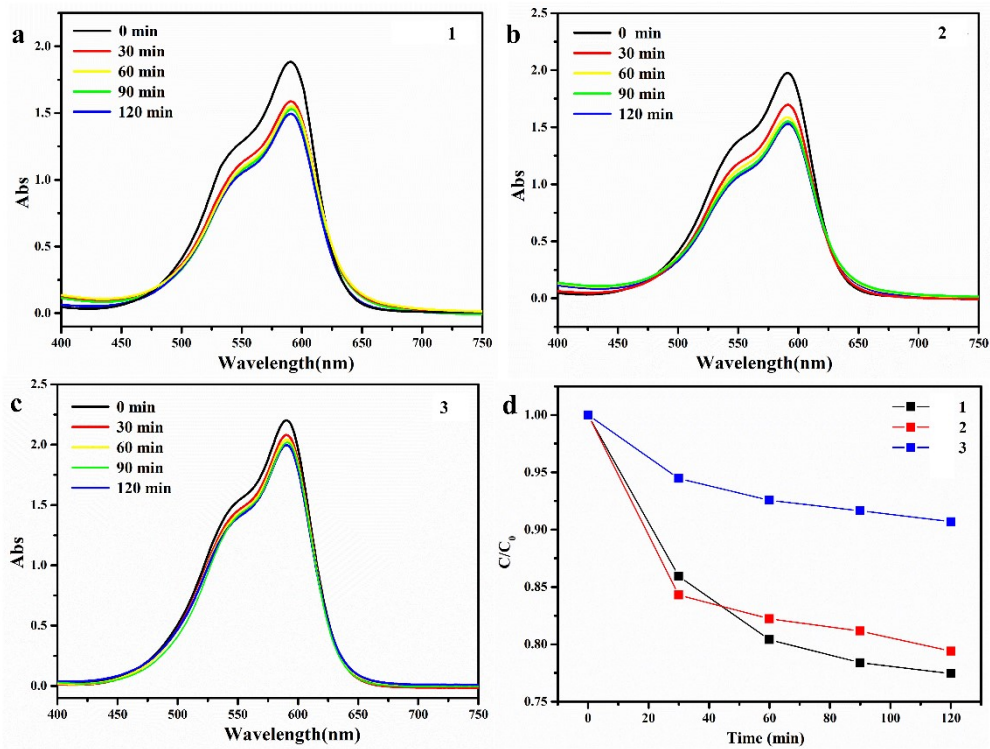

Fig. S4 a-c Dark reaction absorption curves; d dark adsorption rates of CV dyes in the presence of CPs 1-3.

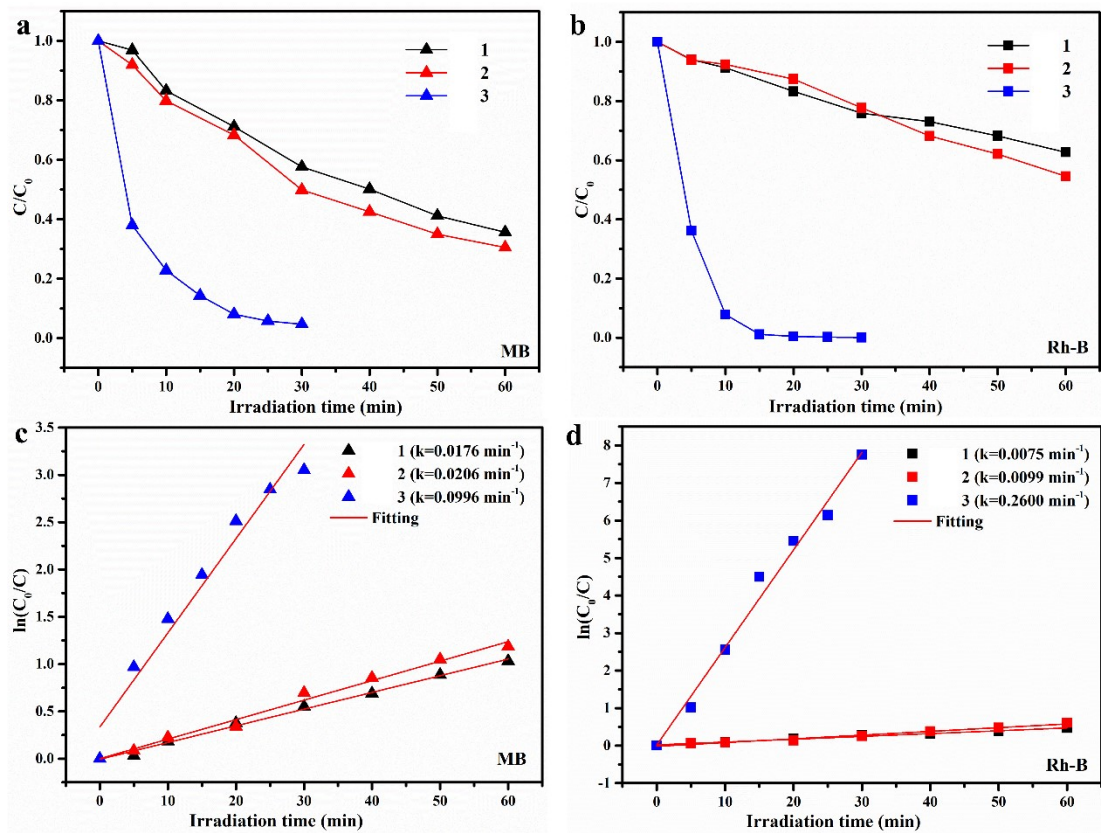

Fig. S5 a-b Degradation rates of MB and Rh-B dyes.

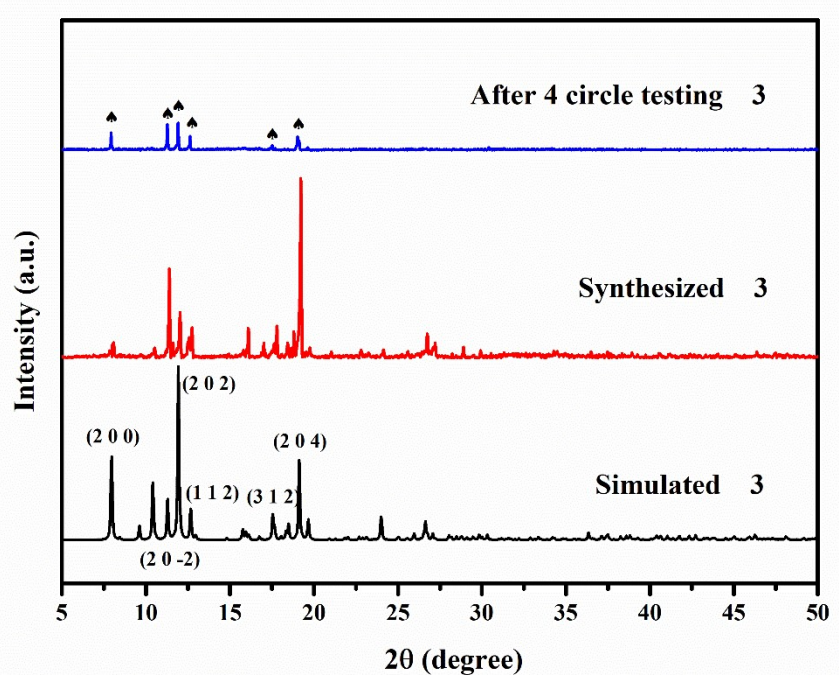

Fig. S6 PXR D patterns of complex 3 before and after the photocatalysis process.

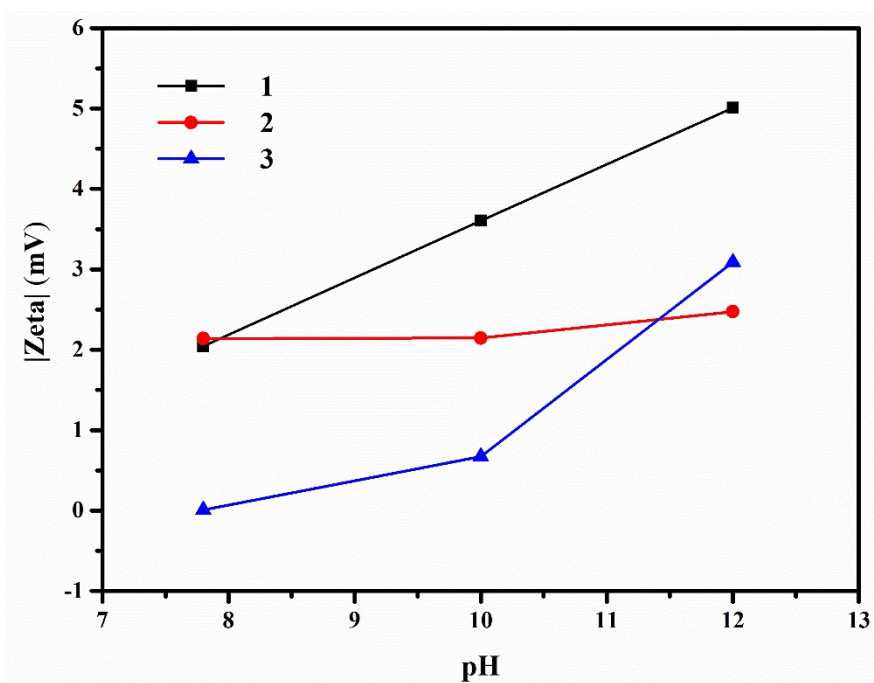

Fig. S7 Zeta potentials at different pH of CPs 1-3.

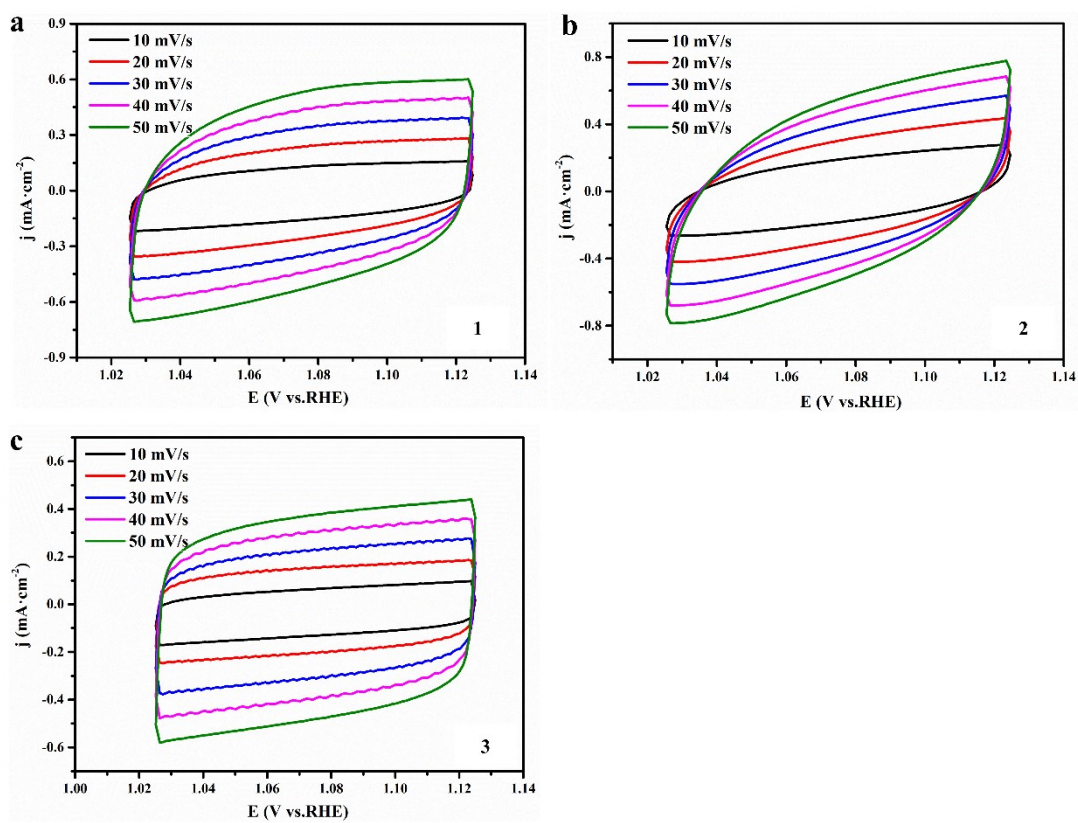

**Fig. S8** The cyclic voltammetry (CV) curves of CPs 1-3.
